# Supplementary material
Source: publisher figshare collection journal article supplement (https://acs.figshare.com/ndownloader/files/4099630)
Supplement: Supplementary file 1 [file 4099630]

# Understanding the Binding Mechanism of Various Chiral SWCNTs and ssDNA: A Computational Study

*Siamkhanthang Neihzial<sup>†</sup>, Ganga Periyasamy<sup>†</sup>, Pralok K. Samanta<sup>†</sup> and Swapan K. Pati<sup>\*†‡</sup>*

*<sup>†</sup>Theoretical Sciences Unit, <sup>‡</sup>New Chemistry Unit*

*Jawaharlal Nehru Center for Advanced Scientific Research*

*Jakkur P. O., Bangalore 560064, India*

*Email: [pati@jncasr.ac.in](mailto:pati@jncasr.ac.in)*

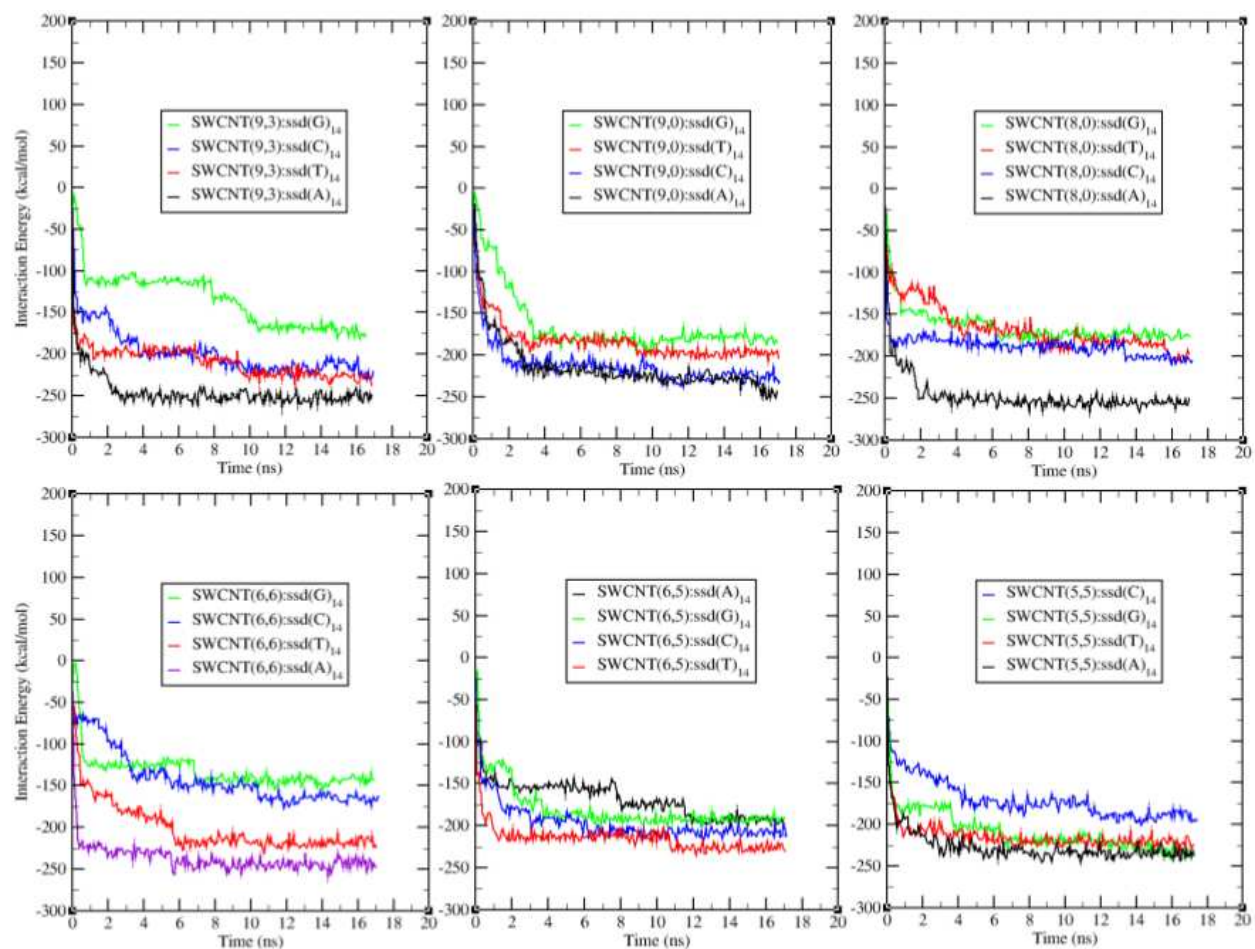

**Figure S1.** Interaction energies between various SWCNTs and ssdA<sub>14</sub>, ssdT<sub>14</sub>, ssdG<sub>14</sub> and ssdC<sub>14</sub> as a function of time for the period of 17 ns.

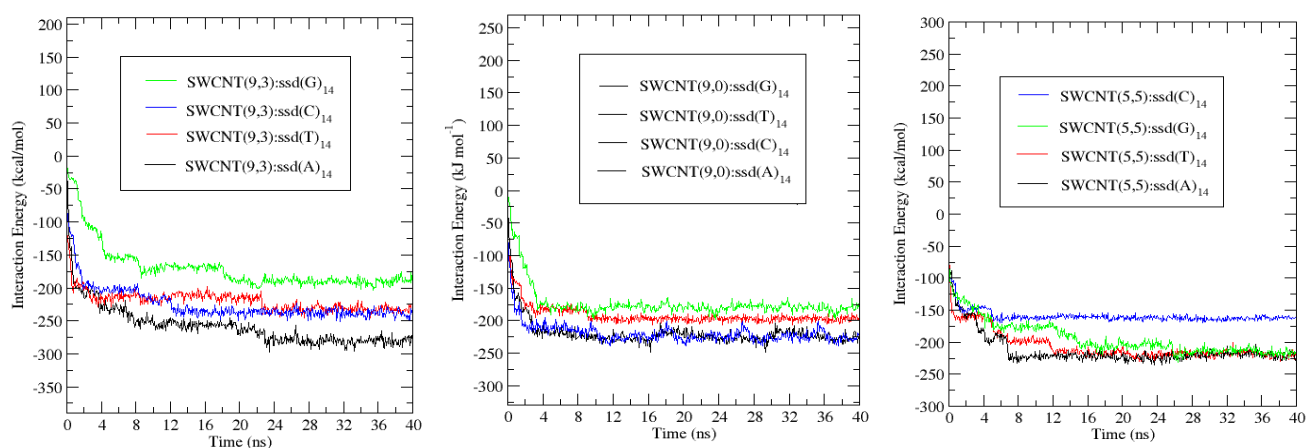

**Figure S2.** Interaction energies between (9, 3), (9, 0) and (5, 5) SWCNT's and ssdA<sub>14</sub>, ssdT<sub>14</sub>, ssdG<sub>14</sub> and ssdC<sub>14</sub> as a function of time for the period of 40 ns.
